# Supplementary material for: Tumor-Suppressive and Immunomodulating Activity of miR-30a-3p and miR-30e-3p in HNSCC Cells and Tumoroids
Source: MDPI journal article supplement (doi:10.3390/ijms241311178), 2023-07-06
Supplement: s1 [file s1]

**Supplementary Data S1:** After transfection or treatments, cells were seeded (2,000 cells/200μl/well for CAL27 and SCC9 and 8,000 cells/200μl/well for CAL33) in 96-well plates at 37°C. Confluence (shown in orange) of CAL27, CAL33 and SCC9 cell lines overexpressing miR-30a-3p or miR-30e-3p was monitored up to 7 days. Images are representative of 6-10 experiments.

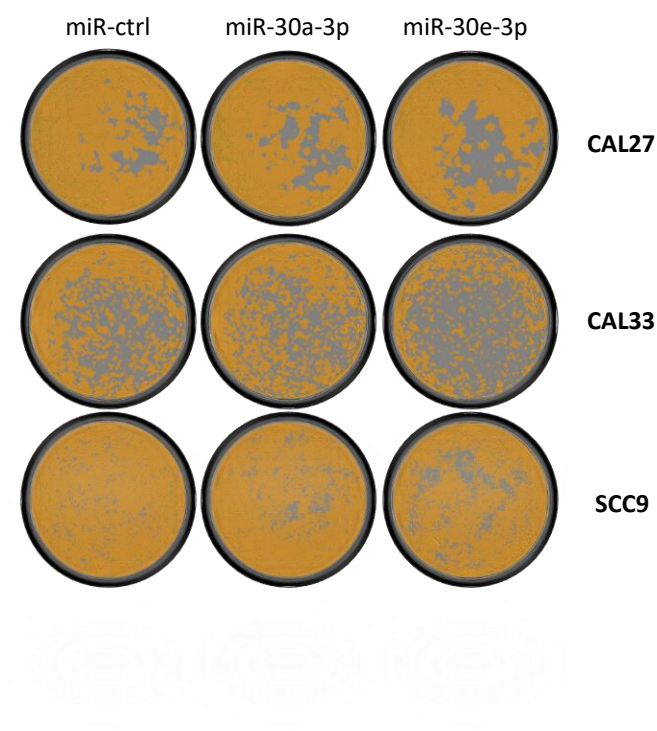

**Supplementary Data S2:** **a.** BMPR2 expression was determined by RT-qPCR in M0 polarized THP-1 exposed to CAL27, CAL33, SCC9 overexpressing miR-30a-3p and miR-30e-3p conditioned media (n = 3-4, \* p < 0.05). **b.** miR-30a-3p and miR-30e-3p expression was determined by RT-qPCR in M0 polarized THP-1 exposed to CAL27, CAL33, SCC9 overexpressing miR-30a-3p and miR-30e-3p conditioned media (n = 1).

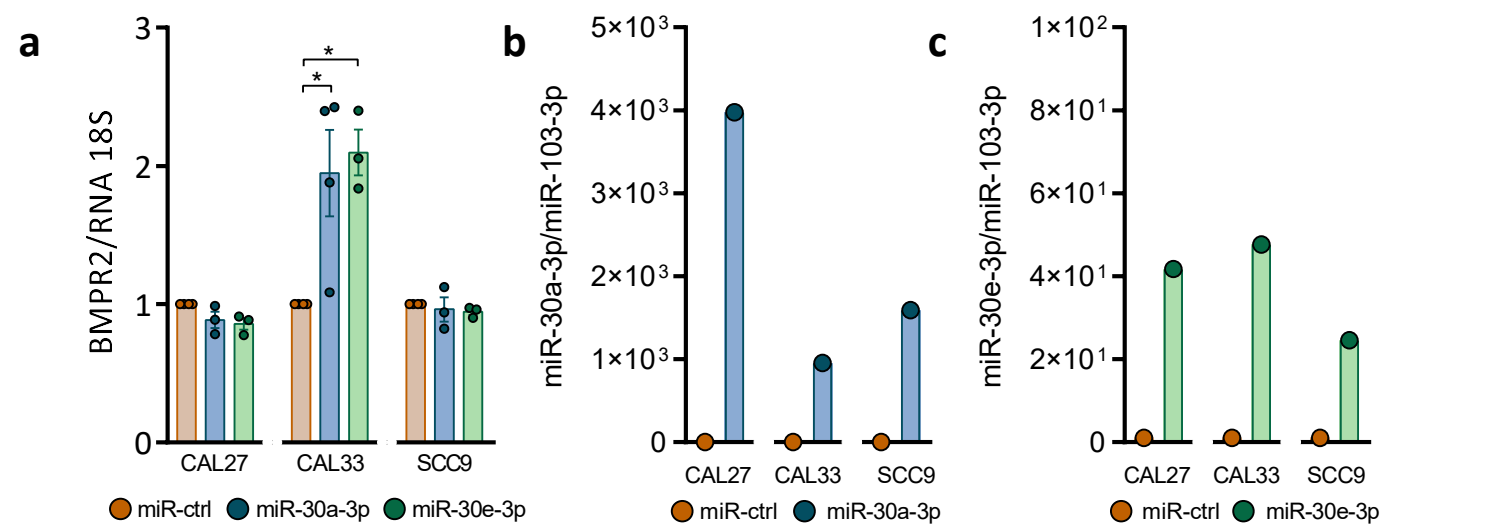

**Supplementary Table S1:** Clinical characteristics of the Patients

| Clinical characteristics of patients                 |     |              |
|------------------------------------------------------|-----|--------------|
| Variable                                             |     | All patients |
| <b>Sex — no. (%)</b>                                 |     |              |
| Male                                                 |     | 90 (82)      |
| Female                                               |     | 20 (18)      |
| <b>Age</b>                                           |     |              |
| Median age —yr                                       |     | 57           |
| <65yr — no. (%)                                      |     | 78 (71)      |
| ≥65yr — no. (%)                                      |     | 32 (29)      |
| <b>ECOG — no. (%)</b>                                |     |              |
| 0-1                                                  |     | 94 (85)      |
| 2                                                    |     | 10 (9)       |
| ≥3                                                   |     | 4 (4)        |
| missing                                              |     | 2 (2)        |
| <b>Karnofsky score</b>                               |     |              |
| Median score                                         |     | 90           |
| Interquartile range                                  |     | 90-100       |
| <80yr — no. (%)                                      |     | 14 (13)      |
| ≥80yr — no. (%)                                      |     | 94 (85)      |
| missing                                              |     | 2 (2)        |
| <b>Charlson Comorbidity Index — no. (%)</b>          |     |              |
| Median score                                         |     | 4            |
| 0                                                    |     | 0            |
| 1-2                                                  |     | 14 (13)      |
| 3-4                                                  |     | 51 (46)      |
| ≥5                                                   |     | 41 (37)      |
| missing                                              |     | 4 (4)        |
| <b>Smoking — no. (%)</b>                             |     |              |
| smoking cessation                                    |     | 46 (42)      |
| active smoking                                       |     | 53 (48)      |
| <i>pack-years means</i>                              |     | 42           |
| no history of smoking                                |     | 5 (5)        |
| missing                                              |     | 6 (5)        |
| <b>Alcohol consumption — no. (%)</b>                 |     |              |
| history of alcohol addiction                         |     | 72 (65)      |
| missing                                              |     | 15 (14)      |
| <b>Primary tumor site — no. (%)</b>                  |     |              |
| Oral cavity                                          |     | 27 (25)      |
| Oropharynx                                           |     | 26 (24)      |
| Hypopharynx                                          |     | 29 (26)      |
| Overlap between several tumor sites                  |     | 28 (25)      |
| <b>TNM classification — no. (%)</b>                  |     |              |
| T                                                    | T1  | 4 (4)        |
|                                                      | T2  | 38 (35)      |
|                                                      | T3  | 45 (41)      |
|                                                      | T4  | 23 (20)      |
| N                                                    | N0  | 15 (14)      |
|                                                      | N1  | 8 (7)        |
|                                                      | N2a | 7 (6)        |
|                                                      | N2b | 41 (37)      |
|                                                      | N2c | 24 (22)      |
|                                                      | N3  | 15 (14)      |
| <b>Histologic type and characteristics — no. (%)</b> |     |              |
| Well differentiated                                  |     | 16 (14)      |
| Modertely differentiated                             |     | 63 (57)      |
| Poorly differentiated                                |     | 26 (24)      |
| Indifferentiated                                     |     | 1 (1)        |
| Squamous-cell carcinoma not specified                |     | 4 (4)        |
| Lymphovascular emboli                                |     | 24           |
| Perineural invasion                                  |     | 11           |
| Capsular rupture of the lymph nodes                  |     | 80           |
| Positive surgical margins                            |     | 51           |
| <b>First-line treatment — no. (%)</b>                |     |              |
| Adjuvant radiotherapy alone                          |     | 37 (33)      |
| Concomitant chemotherapy                             |     | 69 (63)      |
| Without adjuvant therapy                             |     | 4 (4)        |
| <b>Extent of disease — no. (%)</b>                   |     |              |
| Only locoregionally recurrent                        |     | 18 (16)      |
| Metastatic with or without locoregional recurrence   |     | 33 (30)      |
| <b>Total — no. (%)</b>                               |     | <b>110</b>   |

**Supplementary Table S2:** Accession numbers and reference positions or sequences (depending of the provider) of primers used in RT-qPCR analysis.

| Primer sequence | Accession number | Reference position or sequence                                      |
|-----------------|------------------|---------------------------------------------------------------------|
| Hsa-miR-30a-3p  | MIMAT0000088     | 5'CUUUCAGUCGGAUGUUUGCAGC                                            |
| Hsa-miR-30e-3p  | MIMAT0000693     | 5'CUUUCAGUCGGAUGUUUACAGC                                            |
| Let7a           | MI0000060        | 5'TGAGGTAGTAGGTTGTATAGTT                                            |
| RNU44           | NR_002750        | 5'TGCTGACTGAACATGAAGGTCT                                            |
| BMPR2           | NM_001204.6      | 3909                                                                |
| ACVR1           | NM_001105.4      | 1860                                                                |
| TGFBR1          | NM_004612.3      | 1142                                                                |
| LTBP2           | NM_000428.2      | 5359                                                                |
| SPTBN1          | NM_003128.2      | 6443                                                                |
| TGFB1           | NM_000660.5      | 1464                                                                |
| CRLF1           | NM_004750.5      | 1312                                                                |
| RNA18S          | NR_003278.3      | Forward: 5'-TGTGGTGTGAGGAAAGCAG<br>Reverse: 5'-TCCAGACCATTGGCTAGGAC |
